# Supplementary material for: From Pixels to Spectra: Predicting Wine Colorimetric Characteristics Through Machine Learning Models
Source: Research Square preprint supplement (doi:10.21203/rs.3.rs-7643162/v1), 2025-10-08
Supplement: Supplementary file 1 [file bf0c26c72d9680bb822b1784.docx]

# SUPPLEMENTARY DATA

**From Pixels to Spectra: Predicting Wine Colorimetric Characteristics Through Machine Learning Models**

**Naz Erdemir 1, Celal Deniz Sinop 2, Reyhan Selin Uysal 1, *, Tuğba Dalyan 2**

1 Department of Genetics and Bioengineering, Istanbul Bilgi University, Istanbul 34060, Turkey

2 Department of Computer Engineering, Istanbul Bilgi University, Istanbul 34060, Turkey

*Corresponding author: Reyhan Selin Uysal

Address: Istanbul Bilgi University, Kazım Karabekir St., Santral Campus, No:2/13, Eyupsultan/Istanbul

Phone: (+90) 2123116541

E-mail: [selin.uysal@bilgi.edu.tr](mailto:selin.uysal@bilgi.edu.tr)

**Table 1S.** Examined wine samples with corresponding labels. grape varieties. and vintage years.

| Sample Code | Label Name | Grape Variety | Vintage Year |
| --- | --- | --- | --- |
| W1 | w3-2 | - | 1988 |
| W2 | w2-2 | - | 1994 |
| W3 | w1-2 | - | 2014 |
| W4 | Ucmakdere Winery | Syrah | 2023 |
| W5 | Ucmakdere Winery | Syrah | 2024 |
| W6 | Ucmakdere Winery | Cabernet Sauvignon. Merlot | 2016 |
| W7 | Ucmakdere Winery | Cabernet Sauvignon. Merlot | 2017 |
| W8 | Ucmakdere Winery | Cabernet Sauvignon. Merlot | 2018 |
| W9 | Ucmakdere Winery | Cabernet Sauvignon. Merlot | 2019 |
| W10 | Ucmakdere Winery | Cabernet Sauvignon. Merlot | 2020 |
| W11 | Ucmakdere Winery | Cabernet Sauvignon | 2020 |
| W12 | Ucmakdere Winery | Cabernet Sauvignon | 2021 |
| W13 | Ucmakdere Winery | Cabernet Sauvignon | 2023 |
| W14 | Ucmakdere Winery | Cabernet Sauvignon | 2024 |
| W15 | Ucmakdere Winery | Merlot | 2021 |
| W16 | Ucmakdere Winery | Merlot | 2024 |

| Sample Code | Label Name | Grape Variety | Vintage Year |
| --- | --- | --- | --- |
| W17 | Garova | Syrah. Petit Verdot | 2022 |
| W18 | Garova | Okuzgozu | 2022 |
| W19 | Garova | Syrah. Okuzgozu | 2022 |
| W20 | Kavaklıdere Yakut | Okuzgozu. Bogazkere. Carignan. Alicante | 2022 |
| W21 | Cune Rioja Crianza | Tempranillo | 2020 |
| W22 | Kavaklıdere Angora | Cabernet Sauvignon. Merlot. Okuzgozu | 2022 |
| W23 | Kayra Terra | Cabernet Sauvignon. Merlot | 2023 |
| W24 | Kayra Terra | Syrah | 2023 |
| W25 | Diren Collection | Merlot | 2023 |
| W26 | Kavaklıdere | Kalecik Karasi. Yediveren. Carignan. Bogazkere | 1970 |
| W27 | Kavaklıdere Angora | - | 2008 |
| W28 | No Label | Okuzgozu. Bogazkere | 2013 |
| W29 | No Label | - | 2023 |
| W30 | No Label | - | 2023 |
| W31 | No Label | - | 2023 |
| W32 | No Label | - | 2023 |

| Sample Code | Label Name | Grape Variety | Vintage Year |
| --- | --- | --- | --- |
| W33 | No Label | - | 2023 |
| W34 | No Label | - | 2023 |
| W35 | No Label | - | 2023 |
| W36 | No Label | - | 2023 |
| W37 | No Label | - | 2023 |
| W38 | No Label | - | 2023 |
| W39 | No Label | - | 2023 |
| W40 | No Label | - | 2023 |
| W41 | No Label | - | 2023 |
| W42 | No Label | - | 2023 |
| W43 | No Label | Okuzgozu | 2024 |
| W44 | No Label | Bogazkere | 2024 |
| W45 | No Label | - | 2024 |
| W46 | No Label | Cabernet Sauvignon | 2019 |
| W47 | No Label | Cabernet Sauvignon | 2020 |
| W48 | No Label | Cabernet Sauvignon | 2021 |

| Sample Code | Label Name | Grape Variety | Vintage Year |
| --- | --- | --- | --- |
| W49 | No Label | Cabernet Sauvignon. Merlot | 2015 |
| W50 | No Label | Cabernet Sauvignon. Merlot | 2020 |
| W51 | No Label | Cabernet Sauvignon. Merlot | 2022 |
| W52 | No Label | Merlot | 2018 |
| W53 | No Label | Merlot | 2019 |
| W54 | No Label | Merlot | 2020 |
| W55 | No Label | Merlot | 2020 |
| W56 | No Label | Cabernet Sauvignon. Syrah | 2022 |
| W57 | Kayra Buzbag | Okuzgozu. Bogazkere | 2017 |
| W58 | Doluca Rose | Cal Karasi. Grenache | 2023 |
| W59 | Doluca Verano | Cabernet Sauvignon. Okuzgozu | 2021 |
| W60 | DLC Playa Rose | Cal Karasi. Kalecik Karasi | 2023 |
| W61 | Doluca Vinea Rose | Cal Karasi. Kalecik karasi | 2022 |
| W62 | Villa Doluca Neo Rose | Kalecik Karasi. Okuzgozu | 2023 |
| W63 | Doluca Hayal Rose | Kalecik Karasi. Grenache | 2022 |
| W64 | Doluca Vinikol Rose | - | 2023 |

| Sample Code | Label Name | Grape Variety | Vintage Year |
| --- | --- | --- | --- |
| W65 | Doluca Sarafin Rose | Merlot. Cabernet Franc | 2022 |
| W66 | Doluca Mistik | - | 2021 |
| W67 | No Label | Cabernet Sauvignon. Merlot. Bilbizeki | - |
| W68 | No Label | Cabernet Sauvignon. Merlot. Mazronia | - |
| W69 | No Label | Cabernet Sauvignon. Merlot - | - |
| W70 | No Label | Cabernet Sauvignon. Merlot - | - |
| W71 | No Label | Cabernet Sauvignon. Merlot - | - |
| W72 | No Label | Cabernet Sauvignon. Merlot - | - |
| W73 | No Label | Cabernet Sauvignon. Merlot - | - |
| W74 | No Label | Cabernet Sauvignon. Merlot - | - |
| W75 | No Label | Cabernet Sauvignon. Merlot - | - |
| W76 | No Label | Cabernet Sauvignon. Merlot - | - |
| W77 | No Label | Okuzgozu. Kalecik Karasi. Grenache | - |
| W78 | No Label | Okuzgozu. Kalecik Karasi. Cal Karasi | - |
| W79 | No Label | Okuzgozu. Bogazkere | - |
| W80 | No Label | Okuzgozu. Kalecik Karasi | - |

| Sample Code | Label Name | Grape Variety | Vintage Year |
| --- | --- | --- | --- |
| W81 | No Label | Okuzgozu. Cal Karasi. Kalecik Karasi | - |
| W82 | No Label | Okuzgozu. Bilbizeki | - |
| W83 | No Label | Okuzgozu. Mazronia | - |
| W84 | No Label | Okuzgozu. Kalecik Karasi. Cal Karasi | - |
| W85 | No Label | Okuzgozu. Grenache | - |
| W86 | No Label | Okuzgozu. Merlot. Cabernet Franc | - |

**Table 2S.** Colorimetric characteristics of wine samples.

| Wine Sample | A420 | A520 | A620 | IC | T | D | Y (%) D420% | R (%) D520% | B (%) D620% |
| --- | --- | --- | --- | --- | --- | --- | --- | --- | --- |
| W1 | 2.347 | 1.215 | 0.297 | 3.86 | 1.93 | 3.56 | 60.82 | 31.50 | 7.69 |
| W2 | 2.094 | 1.276 | 0.285 | 3.66 | 1.64 | 3.37 | 57.30 | 34.92 | 7.79 |
| W3 | 2.773 | 3.183 | 0.756 | 6.71 | 0.87 | 5.96 | 41.32 | 47.42 | 11.27 |
| W4 | 2.847 | 3.521 | 1.811 | 8.18 | 0.81 | 6.37 | 34.81 | 43.05 | 22.14 |
| W5 | 3.222 | 3.817 | 2.392 | 9.43 | 0.84 | 7.04 | 34.16 | 40.47 | 25.36 |
| W6 | 3.211 | 3.422 | 1.494 | 8.13 | 0.94 | 6.63 | 39.51 | 42.10 | 18.38 |
| W7 | 2.584 | 2.779 | 0.769 | 6.13 | 0.93 | 5.36 | 42.15 | 45.32 | 12.54 |
| W8 | 3.275 | 3.294 | 1.646 | 8.21 | 0.99 | 6.57 | 39.87 | 40.09 | 20.03 |
| W9 | 2.975 | 3.557 | 1.262 | 7.79 | 0.84 | 6.53 | 38.17 | 45.64 | 16.19 |
| W10 | 2.702 | 3.189 | 0.875 | 6.77 | 0.85 | 5.89 | 39.93 | 47.14 | 12.93 |
| W11 | 3.251 | 3.827 | 1.671 | 8.75 | 0.85 | 7.08 | 37.16 | 43.74 | 19.10 |
| W12 | 3.647 | 3.996 | 2.252 | 9.89 | 0.91 | 7.64 | 36.86 | 40.38 | 22.76 |
| W13 | 3.471 | 3.987 | 2.083 | 9.54 | 0.87 | 7.46 | 36.38 | 41.79 | 21.83 |
| W14 | 3.017 | 3.675 | 1.711 | 8.40 | 0.82 | 6.69 | 35.90 | 43.74 | 20.36 |
| W15 | 2.793 | 3.802 | 1.760 | 8.36 | 0.73 | 6.60 | 33.43 | 45.50 | 21.07 |

**Table 2S**. Colourimetric characteristics of wine samples

| Wine Sample | A420 | A520 | A620 | IC | T | D | Y (%) D420% | R (%) D520% | B (%) D620% |
| --- | --- | --- | --- | --- | --- | --- | --- | --- | --- |
| W16 | 2.991 | 3.634 | 1.558 | 8.18 | 0.82 | 6.62 | 36.55 | 44.41 | 19.04 |
| W17 | 2.848 | 3.515 | 1.609 | 7.97 | 0.81 | 6.36 | 35.73 | 44.09 | 20.19 |
| W18 | 2.887 | 3.518 | 1.182 | 7.59 | 0.82 | 6.41 | 38.05 | 46.37 | 15.58 |
| W19 | 2.849 | 3.515 | 1.513 | 7.88 | 0.81 | 6.36 | 36.17 | 44.62 | 19.21 |
| W20 | 2.267 | 3.108 | 0.632 | 6.01 | 0.73 | 5.38 | 37.74 | 51.74 | 10.52 |
| W21 | 2.757 | 3.315 | 0.976 | 7.05 | 0.83 | 6.07 | 39.11 | 47.04 | 13.85 |
| W22 | 2.055 | 2.92 | 0.564 | 5.54 | 0.70 | 4.98 | 37.10 | 52.72 | 10.18 |
| W23 | 2.791 | 3.47 | 1.517 | 7.78 | 0.80 | 6.26 | 35.88 | 44.62 | 19.51 |
| W24 | 3.354 | 3.902 | 2.639 | 9.90 | 0.86 | 7.26 | 33.90 | 39.44 | 26.67 |
| W25 | 3.169 | 3.769 | 1.538 | 8.48 | 0.84 | 6.94 | 37.39 | 44.47 | 18.14 |
| W26 | 2.658 | 2.186 | 0.572 | 5.42 | 1.22 | 4.84 | 49.08 | 40.36 | 10.56 |
| W27 | 2.711 | 2.68 | 0.615 | 6.01 | 1.01 | 5.39 | 45.14 | 44.62 | 10.24 |
| W28 | 2.725 | 3.314 | 0.689 | 6.73 | 0.82 | 6.04 | 40.50 | 49.25 | 10.25 |
| W29 | 2.36 | 0.689 | 0.127 | 3.18 | 3.42 | 3.05 | 74.31 | 21.70 | 3.99 |
| W30 | 1.868 | 0.572 | 0.114 | 2.55 | 3.26 | 2.44 | 73.12 | 22.40 | 4.48 |

Table 2S. Colourimetric characteristics of wine samples

| Wine Sample | A420 | A520 | A620 | IC | T | D | Y (%) D420% | R (%) D520% | B (%) D620% |
| --- | --- | --- | --- | --- | --- | --- | --- | --- | --- |
| W31 | 2.229 | 0.89 | 0.173 | 3.29 | 2.50 | 3.12 | 67.71 | 27.03 | 5.26 |
| W32 | 2.229 | 0.996 | 0.166 | 3.39 | 2.24 | 3.23 | 65.73 | 29.38 | 4.89 |
| W33 | 2.426 | 1.18 | 0.402 | 4.01 | 2.06 | 3.61 | 60.52 | 29.45 | 10.03 |
| W34 | 1.228 | 0.388 | 0.079 | 1.70 | 3.16 | 1.62 | 72.43 | 22.91 | 4.66 |
| W35 | 2.337 | 0.873 | 0.204 | 3.41 | 2.68 | 3.21 | 68.44 | 25.58 | 5.98 |
| W36 | 2.191 | 1.012 | 0.223 | 3.43 | 2.16 | 3.20 | 63.95 | 29.54 | 6.51 |
| W37 | 2.299 | 1.119 | 0.288 | 3.71 | 2.06 | 3.42 | 62.03 | 30.19 | 7.78 |
| W38 | 2.238 | 0.916 | 0.27 | 3.42 | 2.44 | 3.15 | 65.38 | 26.75 | 7.88 |
| W39 | 2.484 | 1.356 | 0.272 | 4.11 | 1.83 | 3.84 | 60.41 | 32.97 | 6.62 |
| W40 | 1.966 | 0.954 | 0.22 | 3.14 | 2.06 | 2.92 | 62.63 | 30.37 | 7.00 |
| W41 | 2.254 | 0.908 | 0.183 | 3.35 | 2.48 | 3.16 | 67.38 | 27.14 | 5.48 |
| W42 | 2.298 | 1.285 | 0.271 | 3.85 | 1.79 | 3.58 | 59.62 | 33.35 | 7.03 |
| W43 | 2.766 | 3.442 | 1.268 | 7.48 | 0.80 | 6.21 | 36.99 | 46.04 | 16.96 |
| W44 | 2.755 | 3.43 | 1.408 | 7.59 | 0.80 | 6.18 | 36.29 | 45.17 | 18.54 |
| W45 | 2.78 | 3.448 | 1.471 | 7.70 | 0.81 | 6.23 | 36.11 | 44.78 | 19.11 |

**Table 2S.** Colourimetric characteristics of wine samples

| Wine Sample | A420 | A520 | A620 | IC | T | D | Y (%) D420% | R (%) D520% | B (%) D620% |
| --- | --- | --- | --- | --- | --- | --- | --- | --- | --- |
| W46 | 2.771 | 3.443 | 1.572 | 7.79 | 0.80 | 6.21 | 35.59 | 44.22 | 20.19 |
| W47 | 2.45 | 2.787 | 0.713 | 5.95 | 0.88 | 5.24 | 41.17 | 46.84 | 11.99 |
| W48 | 2.361 | 2.31 | 0.594 | 5.27 | 1.02 | 4.67 | 44.84 | 43.87 | 11.29 |
| W49 | 2.679 | 3.211 | 0.898 | 6.79 | 0.83 | 5.89 | 39.47 | 47.30 | 13.23 |
| W50 | 2.739 | 3.402 | 1.209 | 7.35 | 0.81 | 6.14 | 37.27 | 46.28 | 16.45 |
| W51 | 2.4 | 2.466 | 0.683 | 5.55 | 0.97 | 4.87 | 43.25 | 44.45 | 12.30 |
| W52 | 2.725 | 3.241 | 0.914 | 6.88 | 0.84 | 5.97 | 39.61 | 47.11 | 13.28 |
| W53 | 2.748 | 3.304 | 0.962 | 7.01 | 0.83 | 6.05 | 39.18 | 47.10 | 13.72 |
| W54 | 2.507 | 2.491 | 0.753 | 5.75 | 1.01 | 5.00 | 43.59 | 43.31 | 13.09 |
| W55 | 2.565 | 2.702 | 0.748 | 6.01 | 0.95 | 5.27 | 42.65 | 44.92 | 12.43 |
| W56 | 2.751 | 3.376 | 0.987 | 7.11 | 0.81 | 6.13 | 38.67 | 47.46 | 13.88 |
| W57 | 2.263 | 1.99 | 0.46 | 4.71 | 1.14 | 4.25 | 48.02 | 42.23 | 9.75 |
| W58 | 0.343 | 0.224 | 0.039 | 0.61 | 1.54 | 0.57 | 56.69 | 36.93 | 6.38 |
| W59 | 0.293 | 0.229 | 0.037 | 0.56 | 1.28 | 0.52 | 52.36 | 40.97 | 6.68 |
| W60 | 0.259 | 0.187 | 0.027 | 0.47 | 1.39 | 0.45 | 54.79 | 39.44 | 5.77 |

**Table 2S.** Colourimetric characteristics of wine samples

| Wine Sample | A420 | A520 | A620 | IC | T | D | Y (%) D420% | R (%) D520% | B (%) D620% |
| --- | --- | --- | --- | --- | --- | --- | --- | --- | --- |
| W61 | 0.494 | 0.293 | 0.063 | 0.85 | 1.69 | 0.79 | 58.09 | 34.47 | 7.44 |
| W62 | 0.272 | 0.183 | 0.029 | 0.48 | 1.49 | 0.45 | 56.21 | 37.79 | 6.00 |
| W63 | 0.344 | 0.221 | 0.041 | 0.61 | 1.56 | 0.56 | 56.74 | 36.43 | 6.82 |
| W64 | 0.364 | 0.222 | 0.038 | 0.62 | 1.64 | 0.59 | 58.31 | 35.65 | 6.04 |
| W65 | 0.284 | 0.193 | 0.037 | 0.51 | 1.47 | 0.48 | 55.28 | 37.59 | 7.13 |
| W66 | 0.369 | 0.208 | 0.046 | 0.62 | 1.77 | 0.58 | 59.26 | 33.40 | 7.33 |
| W67 | 2.715 | 2.821 | 1.057 | 6.59 | 0.96 | 5.54 | 41.18 | 42.79 | 16.03 |
| W68 | 2.406 | 2.645 | 0.803 | 5.85 | 0.91 | 5.05 | 41.10 | 45.17 | 13.72 |
| W69 | 2.606 | 2.434 | 0.605 | 5.64 | 1.07 | 5.04 | 46.16 | 43.12 | 10.71 |
| W70 | 2.681 | 2.336 | 0.634 | 5.65 | 1.15 | 5.02 | 47.44 | 41.34 | 11.22 |
| W71 | 2.331 | 2.004 | 0.518 | 4.85 | 1.16 | 4.34 | 48.04 | 41.28 | 10.68 |
| W72 | 2.587 | 2.345 | 0.595 | 5.53 | 1.10 | 4.93 | 46.81 | 42.43 | 10.76 |
| W73 | 2.604 | 2.304 | 0.582 | 5.49 | 1.13 | 4.91 | 47.43 | 41.97 | 10.60 |
| W74 | 2.666 | 2.576 | 0.685 | 5.93 | 1.03 | 5.24 | 44.97 | 43.46 | 11.56 |
| W75 | 2.516 | 2.055 | 0.544 | 5.11 | 1.22 | 4.57 | 49.19 | 40.19 | 10.63 |

**Table 2S.** Colourimetric characteristics of wine samples

| Wine Sample | A420 | A520 | A620 | IC | T | D | Y (%) D420% | R (%) D520% | B (%) D620% |
| --- | --- | --- | --- | --- | --- | --- | --- | --- | --- |
| W76 | 2.594 | 1.954 | 0.498 | 5.05 | 1.33 | 4.55 | 51.42 | 38.72 | 9.86 |
| W77 | 2.176 | 2.823 | 0.629 | 5.63 | 0.77 | 5.00 | 38.66 | 50.17 | 11.18 |
| W78 | 2.236 | 2.866 | 0.628 | 5.73 | 0.78 | 5.10 | 39.02 | 50.02 | 10.96 |
| W79 | 2.63 | 3.168 | 0.759 | 6.56 | 0.83 | 5.80 | 40.11 | 48.31 | 11.58 |
| W80 | 2.038 | 2.739 | 0.524 | 5.30 | 0.74 | 4.78 | 38.44 | 51.68 | 9.88 |
| W81 | 2.036 | 2.714 | 0.539 | 5.29 | 0.75 | 4.75 | 38.50 | 51.31 | 10.19 |
| W82 | 2.434 | 2.846 | 0.858 | 6.14 | 0.86 | 5.28 | 39.65 | 46.37 | 13.97 |
| W83 | 2.284 | 2.76 | 0.828 | 5.87 | 0.83 | 5.04 | 38.90 | 47.00 | 14.10 |
| W84 | 2.05 | 2.735 | 0.557 | 5.34 | 0.75 | 4.79 | 38.38 | 51.19 | 10.43 |
| W85 | 2.066 | 2.772 | 0.554 | 5.39 | 0.75 | 4.84 | 38.32 | 51.40 | 10.27 |
| W86 | 2.077 | 2.803 | 0.545 | 5.43 | 0.74 | 4.88 | 38.29 | 51.67 | 10.04 |

**Table 3S.** wine colourimetric properties (RGB, HSV) and their corresponding absorbance values at 420 nm, 520 nm, and 620 nm.

| Sample Code | Red | Green | Blue | Hue | Saturation | Value | A420 | A520 | A620 |
| --- | --- | --- | --- | --- | --- | --- | --- | --- | --- |
| W1 | 179.904 | 84.075 | 12.516 | 25.650 | 93.043 | 70.551 | 2.347 | 1.215 | 0.297 |
| W2 | 182.889 | 82.034 | 15.623 | 23.822 | 91.458 | 71.721 | 2.094 | 1.276 | 0.285 |
| W3 | 109.597 | 21.490 | 22.709 | 359.170 | 80.392 | 42.979 | 2.773 | 3.183 | 0.756 |
| W4 | 50.176 | 20.698 | 25.192 | 350.852 | 58.749 | 19.677 | 2.847 | 3.521 | 1.811 |
| W5 | 49.123 | 19.156 | 23.591 | 351.120 | 61.004 | 19.264 | 3.222 | 3.817 | 2.392 |
| W6 | 120.667 | 22.318 | 24.000 | 358.974 | 81.504 | 47.320 | 3.211 | 3.422 | 1.494 |
| W7 | 120.798 | 22.363 | 23.959 | 359.027 | 81.487 | 47.372 | 2.584 | 2.779 | 0.769 |
| W8 | 118.354 | 25.833 | 23.073 | 1.738 | 80.505 | 46.413 | 3.275 | 3.294 | 1.646 |
| W9 | 95.948 | 17.606 | 25.404 | 354.028 | 81.650 | 37.626 | 2.975 | 3.557 | 1.262 |
| W10 | 102.731 | 17.599 | 24.109 | 355.412 | 82.868 | 40.287 | 2.702 | 3.189 | 0.875 |
| W11 | 65.084 | 17.569 | 23.914 | 351.988 | 73.005 | 25.523 | 3.251 | 3.827 | 1.671 |
| W12 | 75.246 | 17.971 | 24.257 | 353.415 | 76.117 | 29.508 | 3.647 | 3.996 | 2.252 |
| W13 | 58.296 | 19.789 | 25.444 | 351.188 | 66.053 | 22.861 | 3.471 | 3.987 | 2.083 |
| W14 | 58.434 | 19.673 | 25.438 | 351.076 | 66.333 | 22.915 | 3.017 | 3.675 | 1.711 |
| W15 | 62.620 | 24.636 | 29.462 | 352.376 | 60.658 | 24.557 | 2.793 | 3.802 | 1.760 |

| Sample Code | Red | Green | Blue | Hue | Saturation | Value | A420 | A520 | A620 |
| --- | --- | --- | --- | --- | --- | --- | --- | --- | --- |
| W16 | 71.798 | 18.154 | 25.177 | 352.145 | 74.715 | 28.156 | 2.991 | 3.634 | 1.558 |
| W17 | 64.380 | 19.335 | 27.057 | 349.714 | 69.967 | 25.247 | 2.848 | 3.515 | 1.609 |
| W18 | 84.707 | 15.633 | 26.192 | 350.828 | 81.545 | 33.219 | 2.887 | 3.518 | 1.182 |
| W19 | 64.310 | 18.077 | 24.884 | 351.166 | 71.891 | 25.220 | 2.849 | 3.515 | 1.513 |
| W20 | 134.351 | 17.893 | 30.734 | 353.384 | 86.682 | 52.687 | 2.267 | 3.108 | 0.632 |
| W21 | 92.222 | 17.539 | 26.426 | 352.860 | 80.982 | 36.166 | 2.757 | 3.315 | 0.976 |
| W22 | 142.446 | 21.012 | 32.864 | 354.144 | 85.249 | 55.861 | 2.055 | 2.920 | 0.564 |
| W23 | 69.396 | 18.230 | 26.581 | 350.208 | 73.730 | 27.214 | 2.791 | 3.470 | 1.517 |
| W24 | 61.786 | 18.185 | 25.188 | 350.364 | 70.568 | 24.230 | 3.354 | 3.902 | 2.639 |
| W25 | 99.180 | 16.753 | 25.802 | 353.413 | 83.108 | 38.894 | 3.169 | 3.769 | 1.538 |
| W26 | 120.362 | 33.711 | 29.839 | 2.566 | 75.209 | 47.201 | 2.658 | 2.186 | 0.572 |
| W27 | 123.825 | 29.233 | 29.896 | 359.579 | 76.392 | 48.559 | 2.711 | 2.680 | 0.615 |
| W28 | 118.487 | 16.799 | 23.334 | 356.144 | 85.822 | 46.465 | 2.725 | 3.314 | 0.689 |
| W29 | 223.891 | 151.211 | 36.597 | 36.717 | 83.654 | 87.800 | 2.360 | 0.689 | 0.127 |
| W30 | 226.275 | 162.498 | 61.506 | 36.776 | 72.818 | 88.735 | 1.868 | 0.572 | 0.114 |

| Sample Code | Red | Green | Blue | Hue | Saturation | Value | A420 | A520 | A620 |
| --- | --- | --- | --- | --- | --- | --- | --- | --- | --- |
| W31 | 219.327 | 138.732 | 32.109 | 34.171 | 85.360 | 86.011 | 2.229 | 0.890 | 0.173 |
| W32 | 226.526 | 146.701 | 41.527 | 34.111 | 81.668 | 88.834 | 2.229 | 0.996 | 0.166 |
| W33 | 215.179 | 132.844 | 28.466 | 33.542 | 86.771 | 84.384 | 2.426 | 1.180 | 0.402 |
| W34 | 232.403 | 185.498 | 101.169 | 38.555 | 56.468 | 91.138 | 1.228 | 0.388 | 0.079 |
| W35 | 214.044 | 131.707 | 25.771 | 33.760 | 87.960 | 83.939 | 2.337 | 0.873 | 0.204 |
| W36 | 209.567 | 117.949 | 18.835 | 31.179 | 91.012 | 82.183 | 2.191 | 1.012 | 0.223 |
| W37 | 208.175 | 116.022 | 16.777 | 31.111 | 91.941 | 81.637 | 2.299 | 1.119 | 0.288 |
| W38 | 219.515 | 133.508 | 24.221 | 33.576 | 88.966 | 86.084 | 2.238 | 0.916 | 0.270 |
| W39 | 190.619 | 88.299 | 15.841 | 24.874 | 91.690 | 74.753 | 2.484 | 1.356 | 0.272 |
| W40 | 212.446 | 124.025 | 28.867 | 31.101 | 86.412 | 83.312 | 1.966 | 0.954 | 0.220 |
| W41 | 210.512 | 123.533 | 17.545 | 32.955 | 91.666 | 82.554 | 2.254 | 0.908 | 0.183 |
| W42 | 203.341 | 111.528 | 15.825 | 30.622 | 92.218 | 79.742 | 2.298 | 1.285 | 0.271 |
| W43 | 78.514 | 24.252 | 32.630 | 350.736 | 69.111 | 30.790 | 2.766 | 3.442 | 1.268 |
| W44 | 60.246 | 25.054 | 32.477 | 347.345 | 58.413 | 23.626 | 2.755 | 3.430 | 1.408 |
| W45 | 123.222 | 92.426 | 97.868 | 349.399 | 24.992 | 48.322 | 2.780 | 3.448 | 1.471 |

| Sample Code | Red | Green | Blue | Hue | Saturation | Value | A420 | A520 | A620 |
| --- | --- | --- | --- | --- | --- | --- | --- | --- | --- |
| W46 | 65.255 | 20.301 | 28.308 | 349.314 | 68.889 | 25.590 | 2.679 | 3.211 | 0.898 |
| W47 | 91.998 | 31.662 | 40.097 | 351.612 | 65.584 | 36.077 | 2.739 | 3.402 | 1.209 |
| W48 | 89.693 | 21.086 | 30.024 | 352.184 | 76.491 | 35.174 | 2.361 | 2.310 | 0.594 |
| W49 | 99.198 | 24.355 | 31.889 | 353.960 | 75.448 | 38.901 | 2.679 | 3.211 | 0.898 |
| W50 | 115.674 | 23.363 | 32.281 | 354.204 | 79.803 | 45.362 | 2.450 | 2.787 | 0.713 |
| W51 | 127.306 | 30.946 | 32.802 | 358.845 | 75.691 | 49.924 | 2.400 | 2.466 | 0.683 |
| W52 | 100.951 | 26.643 | 32.704 | 355.106 | 73.608 | 39.589 | 2.725 | 3.241 | 0.914 |
| W53 | 91.351 | 26.649 | 33.851 | 353.321 | 70.828 | 35.824 | 2.748 | 3.304 | 0.962 |
| W54 | 126.517 | 31.517 | 30.646 | 0.545 | 75.777 | 49.614 | 2.507 | 2.491 | 0.753 |
| W55 | 114.902 | 24.839 | 30.766 | 356.052 | 78.382 | 45.060 | 2.565 | 2.702 | 0.748 |
| W56 | 83.590 | 20.022 | 29.711 | 350.854 | 76.048 | 32.780 | 2.751 | 3.376 | 0.987 |
| W57 | 150.345 | 46.823 | 30.234 | 8.287 | 79.890 | 58.959 | 2.263 | 1.990 | 0.460 |
| W58 | 239.126 | 203.308 | 178.545 | 24.526 | 25.334 | 93.775 | 0.343 | 0.224 | 0.039 |
| W59 | 236.656 | 190.540 | 166.343 | 20.648 | 29.711 | 92.806 | 0.293 | 0.229 | 0.037 |
| W60 | 236.722 | 188.065 | 160.734 | 21.581 | 32.100 | 92.832 | 0.259 | 0.187 | 0.027 |

| Sample Code | Red | Green | Blue | Hue | Saturation | Value | A420 | A520 | A620 |
| --- | --- | --- | --- | --- | --- | --- | --- | --- | --- |
| W61 | 236.151 | 199.142 | 178.079 | 21.762 | 24.591 | 92.608 | 0.494 | 0.293 | 0.063 |
| W62 | 238.751 | 206.770 | 186.918 | 22.980 | 21.710 | 93.628 | 0.272 | 0.183 | 0.029 |
| W63 | 238.173 | 203.119 | 182.397 | 22.292 | 23.418 | 93.401 | 0.344 | 0.221 | 0.041 |
| W64 | 237.343 | 200.150 | 174.174 | 24.673 | 26.615 | 93.076 | 0.364 | 0.222 | 0.038 |
| W65 | 237.846 | 203.348 | 184.287 | 21.354 | 22.518 | 93.273 | 0.284 | 0.193 | 0.037 |
| W66 | 238.001 | 203.354 | 177.179 | 25.821 | 25.555 | 93.334 | 0.369 | 0.208 | 0.046 |
| W67 | 123.230 | 29.509 | 30.511 | 359.359 | 76.054 | 48.325 | 2.715 | 2.821 | 1.057 |
| W68 | 117.941 | 27.973 | 30.826 | 358.097 | 76.283 | 46.251 | 2.406 | 2.645 | 0.803 |
| W69 | 120.701 | 24.633 | 27.603 | 358.145 | 79.592 | 47.334 | 2.606 | 2.434 | 0.605 |
| W70 | 120.912 | 25.054 | 26.694 | 358.973 | 79.279 | 47.416 | 2.681 | 2.336 | 0.634 |
| W71 | 131.147 | 29.024 | 27.078 | 1.123 | 79.353 | 51.430 | 2.331 | 2.004 | 0.519 |
| W72 | 122.196 | 26.507 | 26.951 | 359.721 | 78.307 | 47.919 | 2.587 | 2.345 | 0.595 |
| W73 | 123.175 | 25.179 | 27.479 | 358.591 | 79.559 | 48.304 | 2.604 | 2.304 | 0.582 |
| W74 | 113.906 | 22.967 | 27.864 | 356.769 | 79.837 | 44.669 | 2.666 | 2.576 | 0.685 |
| W75 | 122.221 | 27.815 | 28.476 | 359.580 | 77.242 | 47.929 | 2.516 | 2.0553 | 0.544 |

| Sample Code | Red | Green | Blue | Hue | Saturation | Value | A420 | A520 | A620 |
| --- | --- | --- | --- | --- | --- | --- | --- | --- | --- |
| W76 | 134.864 | 42.617 | 39.911 | 1.709 | 70.406 | 52.888 | 2.594 | 1.953 | 0.497 |
| W77 | 132.412 | 21.214 | 29.885 | 355.322 | 83.978 | 51.926 | 2.176 | 2.823 | 0.629 |
| W78 | 130.009 | 20.862 | 29.069 | 355.488 | 83.953 | 50.984 | 2.236 | 2.866 | 0.628 |
| W79 | 127.633 | 21.578 | 28.906 | 355.854 | 83.094 | 50.052 | 2.630 | 3.168 | 0.759 |
| W80 | 107.147 | 21.052 | 28.073 | 355.108 | 80.352 | 42.018 | 2.038 | 2.739 | 0.524 |
| W81 | 132.936 | 21.431 | 29.811 | 355.491 | 83.878 | 52.132 | 2.036 | 2.714 | 0.539 |
| W82 | 120.425 | 22.617 | 30.293 | 355.291 | 81.219 | 47.225 | 2.434 | 2.846 | 0.858 |
| W83 | 119.647 | 22.973 | 30.586 | 355.275 | 80.799 | 46.921 | 2.284 | 2.760 | 0.828 |
| W84 | 133.052 | 22.060 | 29.688 | 355.876 | 83.420 | 52.177 | 2.050 | 2.735 | 0.557 |
| W85 | 131.554 | 20.264 | 28.669 | 355.469 | 84.597 | 51.590 | 2.066 | 2.772 | 0.554 |
| W86 | 133.236 | 22.293 | 29.826 | 355.926 | 83.268 | 52.250 | 2.077 | 2.803 | 0.545 |
